# Supplementary material for: Nutritional Intake and Biomarker Status in Strict Raw Food Eaters
Source: MDPI journal article supplement (doi:10.3390/nu14091725), 2022-04-21
Supplement: s1 [file s1]

## Supplement:

# Nutritional intake and biomarker status in strict raw food eaters

Klaus Abraham <sup>1\*</sup>, Iris Trefflich <sup>1</sup>, Fabian Gauch <sup>1</sup>, and Cornelia Weikert <sup>1</sup>

German Federal Institute for Risk Assessment, Department of Food Safety, 10589 Berlin, Germany

**Supplemental Table S1.** Nutrient intake based on 3-day weighed food records in women and men of raw food eaters, RBVD vegans and RBVD omnivores

|                          | Women                           |                                 |                                   | Men                                |                                   |                                    | Reference Values       |
|--------------------------|---------------------------------|---------------------------------|-----------------------------------|------------------------------------|-----------------------------------|------------------------------------|------------------------|
|                          | Raw food (n=5)                  | Vegan (n=18)                    | Omnivore (n=14)                   | Raw food (n=10)                    | Vegan (n=14)                      | Omnivore (n=13)                    | D-A-CH*                |
| Energy (J/d)             | 5.6 (4.0-6.5) <sup>a,b,c</sup>  | 8.1 (7.1-9.9) <sup>a,b</sup>    | 9.1 (8.1-10.0) <sup>a,c</sup>     | 9.6 (8.1-13.0)                     | 10.7 (9.6-13.2)                   | 10.2 (9.1-12.1)                    |                        |
| Fiber (g/d)              | 39 (35-43) <sup>a</sup>         | 42 (34-55) <sup>a,d</sup>       | 23 (18-31) <sup>a,d</sup>         | 62 (53-79) <sup>a,c</sup>          | 52 (43-62) <sup>a,d</sup>         | 26 (23-30) <sup>a,c,d</sup>        | ≥30 mg/d               |
| Protein (g/d)            | 38 (27-65) <sup>a,c</sup>       | 61 (49-86) <sup>a</sup>         | 79 (69-90) <sup>a,c</sup>         | 79 (38-109)                        | 94 (71-128)                       | 106 (72-127)                       |                        |
| Carbohydrate (g/d)       | 119 (93-153) <sup>a,b</sup>     | 231 (208-270) <sup>a,b</sup>    | 205 (186-229) <sup>a</sup>        | 210 (186-297) <sup>a</sup>         | 351 (270-400) <sup>a,d</sup>      | 231 (212-282) <sup>a,d</sup>       |                        |
| Saccharose (g/d)         | 35 (30-49)                      | 48 (36-58)                      | 45 (38-54)                        | 77 (53-105) <sup>a,c</sup>         | 59 (39-79) <sup>a</sup>           | 35 (29-56) <sup>a,c</sup>          |                        |
| Fat (g/d)                | 31 (22-74) <sup>a,c</sup>       | 80 (62-109) <sup>a</sup>        | 98 (89-112) <sup>a,c</sup>        | 116 (76-154)                       | 95 (83-107)                       | 129 (90-155)                       | 30% Energy             |
| Retinol equ. (µg/d)      | 1538 (958-3432)                 | 2126 (1336-2674)                | 1455 (1052-1728)                  | 3849 (1656-5052) <sup>a,b,c</sup>  | 1204 (806-2002) <sup>a,b</sup>    | 1340 (1101-2091) <sup>a,c</sup>    | F: 700; M: 850         |
| Vitamin B12 (µg/d)       | 0.01 (0.00-0.10) <sup>a,c</sup> | 0.21 (0.10-0.34) <sup>a,d</sup> | 4.83 (4.03-5.77) <sup>a,c,d</sup> | 1.78 (0.07-7.96) <sup>a</sup>      | 0.48 (0.16-0.95) <sup>a,d</sup>   | 7.72 (5.08-9.96) <sup>a,d</sup>    | 4.0                    |
| Vitamin D (µg/d)         | 0.65 (0.29-2.99)                | 0.97 (0.34-1.42)                | 2.08 (1.07-2.51)                  | 6.03 (3.02-12.11) <sup>a,b</sup>   | 0.87 (0.21-1.95) <sup>a,b,d</sup> | 3.05 (2.19-4.61) <sup>a,d</sup>    | 20                     |
| Folic acid (µg/d)        | 396 (272-412) <sup>a</sup>      | 440 (309-602) <sup>a,d</sup>    | 294 (244-341) <sup>a,d</sup>      | 553 (474-1168) <sup>a,c</sup>      | 473 (354-682) <sup>a</sup>        | 326 (260-370) <sup>a,c</sup>       | 300                    |
| Vitamin B1 (mg/d)        | 1.08 (0.82-1.18)                | 1.74 (1.10-2.01)                | 1.13 (0.98-1.45)                  | 1.89 (1.28-3.05)                   | 1.77 (1.51-2.27)                  | 1.54 (1.22-1.90)                   | F: 1.0; M: 1.2-1.3     |
| Vitamin B2 (mg/d)        | 1.19 (0.97-1.33)                | 1.27 (0.94-1.93)                | 1.87 (1.55-2.01)                  | 1.89 (1.64-3.08)                   | 1.84 (1.19-2.21)                  | 2.15 (1.87-2.40)                   | F: 1.0-1.1; M: 1.3-1.4 |
| Niacin equ. (mg/d)       | 10.5 (5.4-16.3) <sup>a,c</sup>  | 13.2 (10.9-18.4) <sup>a</sup>   | 17.5 (15.1-22.3) <sup>a,c</sup>   | 23.3 (15.7-29.2)                   | 14.6 (13.1-20.8)                  | 18.9 (15.0-34.3)                   | F: 11-13; M: 15-16     |
| Vitamin B6 (mg/d)        | 2.05 (1.08-2.25)                | 2.07 (1.64-2.69)                | 1.63 (1.29-1.77)                  | 3.33 (2.85-5.43) <sup>a,b,c</sup>  | 2.37 (2.14-2.99) <sup>a,b</sup>   | 2.04 (1.55-2.44) <sup>a,c</sup>    | F: 1.4; M: 1.6         |
| Vitamin C (mg/d)         | 315 (220-320)                   | 173 (120-276)                   | 131 (98-217)                      | 401 (273-481) <sup>a,b,c</sup>     | 218 (108-317) <sup>a,b</sup>      | 145 (120-176) <sup>a,c</sup>       | F: 95; M: 110          |
| Vitamin E (mg/d)         | 17.5 (9.0-24.2) <sup>a</sup>    | 24.1 (15.0-37.2) <sup>a,d</sup> | 12.4 (10.9-17.1) <sup>a,d</sup>   | 27.7 (16.5-40.9) <sup>a</sup>      | 26.6 (17.5-41.0) <sup>a,d</sup>   | 13.9 (11.4-18.8) <sup>a,d</sup>    | F: 12; M: 13-15        |
| Vitamin K (µg/d)         | 167 (72-227) <sup>a</sup>       | 265 (171-390) <sup>a,d</sup>    | 96 (67-338) <sup>a,d</sup>        | 250 (188-336) <sup>a,c</sup>       | 250 (149-473) <sup>a,d</sup>      | 129 (77-175) <sup>a,c,d</sup>      | F: 60-65; M: 70-80     |
| Panthothenic acid (mg/d) | 3.99 (3.65-6.37)                | 4.35 (3.64-5.07)                | 4.92 (4.17-7.17)                  | 9.83 (5.92-15.83) <sup>a,b,c</sup> | 4.51 (4.15-6.30) <sup>a,b</sup>   | 5.38 (4.48-7.58) <sup>a,c</sup>    | 5                      |
| Potassium (g/d)          | 3.56 (3.41-4.33)                | 4.06 (3.17-4.94)                | 3.17 (2.87-3.53)                  | 6.69 (5.20-8.44) <sup>a,b,c</sup>  | 4.79 (3.64-6.22) <sup>a,b</sup>   | 3.36 (3.08-4.26) <sup>a,c</sup>    | 4                      |
| Calcium (mg/d)           | 561 (365-632) <sup>a,c</sup>    | 852 (652-1127) <sup>a</sup>     | 973 (803-1259) <sup>a,c</sup>     | 710 (653-1032)                     | 1156 (707-1439)                   | 1179 (835-1461)                    | 1000                   |
| Magnesium (g/d)          | 407 (289-512) <sup>a</sup>      | 619 (470-661) <sup>a,d</sup>    | 367 (306-443) <sup>a,d</sup>      | 742 (466-931) <sup>a</sup>         | 714 (606-904) <sup>a,d</sup>      | 486 (373-536) <sup>a,d</sup>       | F: 300; M: 350         |
| Zinc (mg/d)              | 4.5 (2.8-6.8) <sup>a,b,c</sup>  | 10.0 (7.4-12.5) <sup>a,b</sup>  | 11.6 (9.8-12.8) <sup>a,c</sup>    | 13.1 (7.5-18.7)                    | 11.8 (10.7-14.5)                  | 15.3 (12.2-19.3)                   | F: 7-10; M: 11-16      |
| Iodine (µg/d)            | 49.6 (37.4-64.6) <sup>a,c</sup> | 74.8 (48.9-124.6) <sup>a</sup>  | 100.5 (76.5-142.6) <sup>a,c</sup> | 78.9 (51.7-106.0) <sup>a</sup>     | 88.0 (41.6-104.5) <sup>a,d</sup>  | 165.9 (106.2-181.5) <sup>a,d</sup> | F: 150; M: 180-200     |
| Iron (mg/d)              | 10.0 (9.5-15.1) <sup>a</sup>    | 20.7 (15.4-23.9) <sup>a,d</sup> | 13.2 (11.6-17.3) <sup>a,d</sup>   | 22.4 (15.8-29.7) <sup>a</sup>      | 25.0 (19.0-30.2) <sup>a,d</sup>   | 14.8 (13.7-21.5) <sup>a,d</sup>    | F: 10-15; M: 10        |

Data presented as median (Q1–Q3). Values sharing a common superscript letter were significantly different from each other. ANOVA with post hoc analysis ( $p < 0.05$ ): a) significant differences within sex strata; b)–d): significant differences between type of diet.

\* D-A-CH reference values: common reference values of the nutrition societies of the three D-A-CH countries (Germany [D], Austria [A], and Switzerland [CH]). F: women; M: men [17]

**Supplement Table S2.** Intake of selected food groups based on 3-day weighed food records in women and men of raw food eaters, RBVD vegans and RBVD omnivores

| Food group                  | Women                        |                              |                                      | Men                             |                                |                                    |
|-----------------------------|------------------------------|------------------------------|--------------------------------------|---------------------------------|--------------------------------|------------------------------------|
|                             | Raw food (n=5)<br>(g/d)      | Vegan (n=18)<br>(g/d)        | Omnivore (n=14)<br>(g/d)             | Raw food (n=10)<br>(g/d)        | Vegan (n=14)<br>(g/d)          | Omnivore (n=13)<br>(g/d)           |
| Raw vegetables              | 310 (292-482)                | 217 (94-426)                 | 108 (60-145)                         | 566 (227-671) <sup>a,b,c</sup>  | 119 (75-255) <sup>a,b</sup>    | 81 (41-193) <sup>a,c</sup>         |
| Cabbage family              | 0.0 (0.0-51.7)               | 9.8 (0.0 -36.7)              | 0.0 (0.0-23.0)                       | 8.8 (0.0-26.0)                  | 48.2 (0.0-83.7)                | 0.0 (0.0-56.3)                     |
| Mushrooms                   | 8.7 (0.0-31.0)               | 0.0 (0.0-21.3)               | 0.0 (0.0-0.0)                        | 0.0 (0.0-0.0)                   | 0.0 (0.0-6.7)                  | 0.0 (0.0-12.3)                     |
| Germinated cereals/legumes* | 0.0 (0.0-4.0)                | .                            | .                                    | 0.0 (0.0-173)                   | .                              | .                                  |
| Seaweed / Algae*            | 0.7 (0.0-1.7)                | .                            | .                                    | 0.0 (0.0-1.0)                   | .                              | .                                  |
| Fresh fruit                 | 409 (365-425) <sup>a,c</sup> | 202 (103-315) <sup>a</sup>   | 133 (41-215) <sup>a,c</sup>          | 906 (587-1268) <sup>a,b,c</sup> | 154 (69-191) <sup>a,b</sup>    | 50 (0-211) <sup>a,c</sup>          |
| Dried fruits                | 10.0 (0.0-21.0)              | 1.2 (0.0-8.0)                | 0.0 (0.0-0.0)                        | 38.0 (0.0-149.7) <sup>a,c</sup> | 5.8 (0.0-28.7) <sup>a,d</sup>  | 0.0 (0.0-0.0) <sup>a,c,d</sup>     |
| Fruit juice                 | 37.7 (0.0-40.0)              | 32.8 (1.3-125.3)             | 27.8 (0.0-115.3)                     | 19.2 (0.0-79.7)                 | 11.2 (0.0-103.7)               | 76.7 (0.0-162.7)                   |
| Nuts/Seeds                  | 32.3 (13.3-56.7)             | 15.3 (4.3-39.0)              | 4.7 (0.0-23.7)                       | 64.8 (0.0- 218.3)               | 20.3 (1.3-37.3)                | 0.7 (0.0-19.0)                     |
| Fat (plant based)           | 9.0 (0.7-20.7)               | 16.2 (11.7-26.0)             | 11.5 (7.7-14.0)                      | 0.0 (0.0-49.0)                  | 23.2 (8.0-34.0)                | 10.0 (8.7-17.7)                    |
| Fat (animal based)          | 0.0 (0.0-0.0) <sup>a,c</sup> | 0.0 (0.0-0.0) <sup>a,d</sup> | 15.0 (5.3-22.7) <sup>a,c,d</sup>     | 0.0 (0.0-0.0) <sup>a</sup>      | 0.0 (0.0-0.0) <sup>a,d</sup>   | 16.0 (0.0-25.0) <sup>a,d</sup>     |
| Meat                        | 0.0 (0.0-0.0) <sup>a,c</sup> | 0.0 (0.0-0.0) <sup>a,d</sup> | 83.8 (42.0-131.3) <sup>a,c,d</sup>   | 2.3 (0.0-56.7) <sup>a,b</sup>   | 0.0 (0.0-0.0) <sup>a,b,d</sup> | 72.3 (0.0-132.7) <sup>a,d</sup>    |
| Fish                        | 0.0 (0.0-0.0)                | 0.0 (0.0-0.0)                | 0.0 (0.0-0.0)                        | 0.0 (0.0-0.0) <sup>a</sup>      | 0.0 (0.0-0.0) <sup>a,d</sup>   | 0.0 (0.0-40.3) <sup>a,d</sup>      |
| Eggs                        | 0.0 (0.0-0.0) <sup>a,c</sup> | 0.0 (0.0-0.0) <sup>a,d</sup> | 17.2 (6.3-27.3) <sup>a,c,d</sup>     | 0.0 (0.0-0.0) <sup>a</sup>      | 0.0 (0.0-0.0) <sup>a,d</sup>   | 22.7 (8.7-55.3) <sup>a,d</sup>     |
| Low-fat dairy products      | 0.0 (0.0-0.0) <sup>a,c</sup> | 0.0 (0.0-0.0) <sup>a,d</sup> | 239.2 (119.0-328.3) <sup>a,c,d</sup> | 0.0 (0.0-0.0) <sup>a</sup>      | 0.0 (0.0-0.0) <sup>a,d</sup>   | 259.3 (164.3-429.0) <sup>a,d</sup> |
| Cooked vegetables**         | .                            | 178 (134-241)                | 152 (71-211)                         | .                               | 178 (81-283)                   | 91 (51-177)                        |
| Cooked legumes**            | .                            | 51 (4-104) <sup>a</sup>      | 0 (0-14) <sup>a</sup>                | .                               | 51 (0-88) <sup>a</sup>         | 0 (0-8) <sup>a</sup>               |
| Bread**                     | .                            | 73 (36-111)                  | 88 (72-119)                          | .                               | 107 (56-149)                   | 140 (70-175)                       |
| Pasta, rice, grain**        | .                            | 70 (23-162)                  | 48 (0-117)                           | .                               | 114 (73-268)                   | 83 (0-130)                         |

Data presented as median with interquartile range (Q1-Q3). Values sharing a common superscript letter were significantly different from each other. ANOVA with post hoc analysis ( $p < 0.05$ ): a) significant differences within sex strata; b)-d): significant differences between type of diet.

Food groups marked with \* were not assessed in the RBVD study or with \*\* were not consumed by the raw food eaters.
